# Supplementary material for: Two-dimensional graphene nanoplatelets incorporated PEO/PLA polymer mixture for the enhanced electrochemical performance of quasi-solid polymer electrolytes
Source: Research Square preprint supplement (doi:10.21203/rs.3.rs-7027571/v1), 2025-07-07
Supplement: Supplementary file 1 [file 54979afdedad413f49d423af.docx]

**SUPPORTING INFORMATION**

**Two-dimensional graphene nanoplatelets incorporated PEO/PLA polymer mixture for the enhanced electrochemical performance of quasi-solid polymer electrolytes**

Ankan Gobinda Choudhurya, Gayathri Viswanathana, Elamathy Balamoorthya,b, Geetha Nagarajanc, Duraisamy Kumaresana,b,*, Thirugnasambandam G. Manivasagama,b,*

a Department of Chemical Engineering and Materials Science, Amrita School of Engineering, Amrita Vishwa Vidyapeetham, Coimbatore, India

b Centre of Excellence in Advanced Materials and Green Technologies (CoE-AMGT), Amrita School of Engineering, Amrita Vishwa Vidyapeetham, Coimbatore, India

c Department of Electrical and Electronics Engineering, Amrita School of Engineering, Amrita Vishwa Vidyapeetham, Coimbatore, India

* Email (s): [k_duraisamy@cb.amrita.edu](mailto:k_duraisamy@cb.amrita.edu), [gm_thiru@cb.amrita.edu](mailto:gm_thiru@cb.amrita.edu)

**S1. Elemental mapping of PEO/PLA-N fibrous polymer blend**


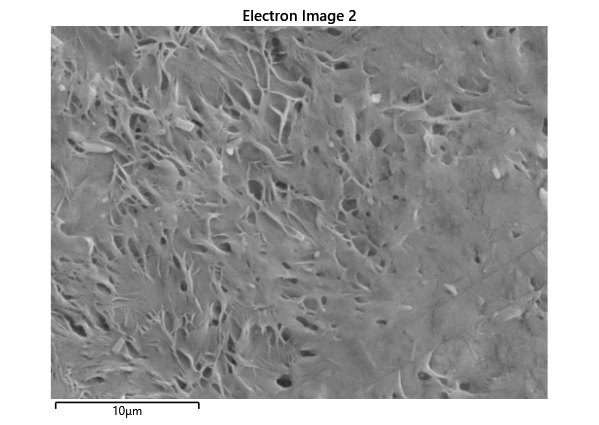

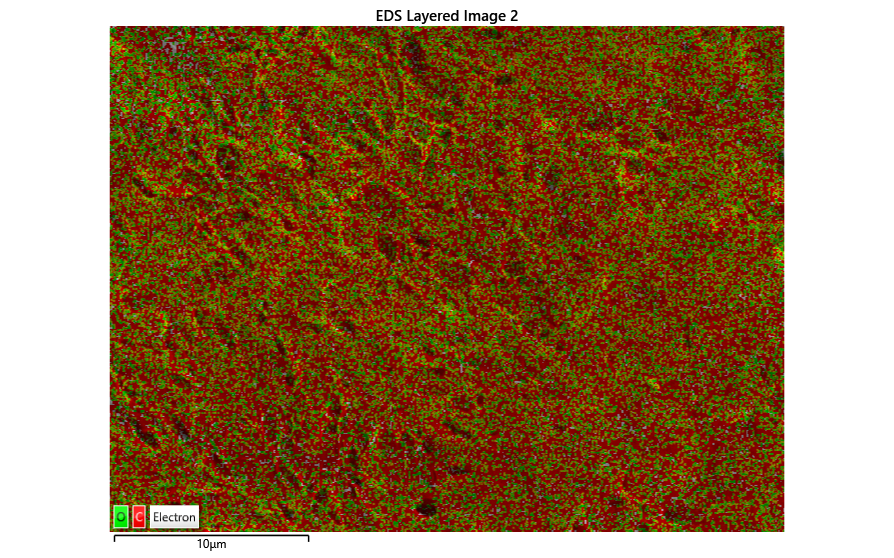


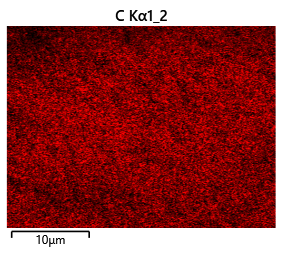

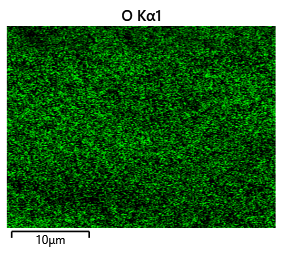


**S2** **Differential capacity plots from GCD of GNP 0 and GNP 2**

**
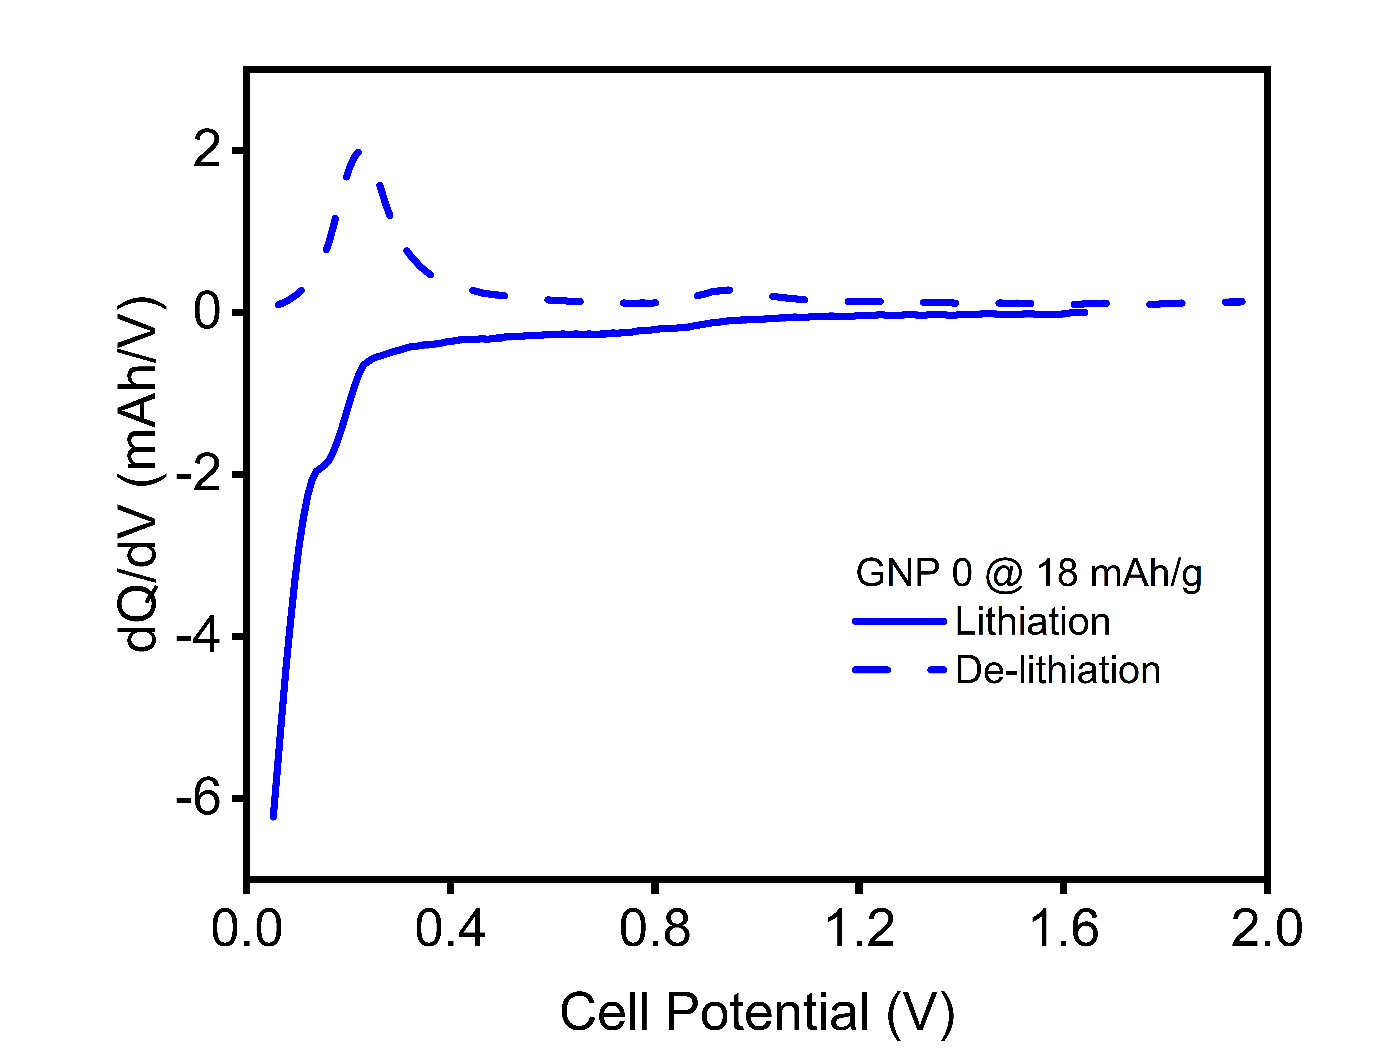


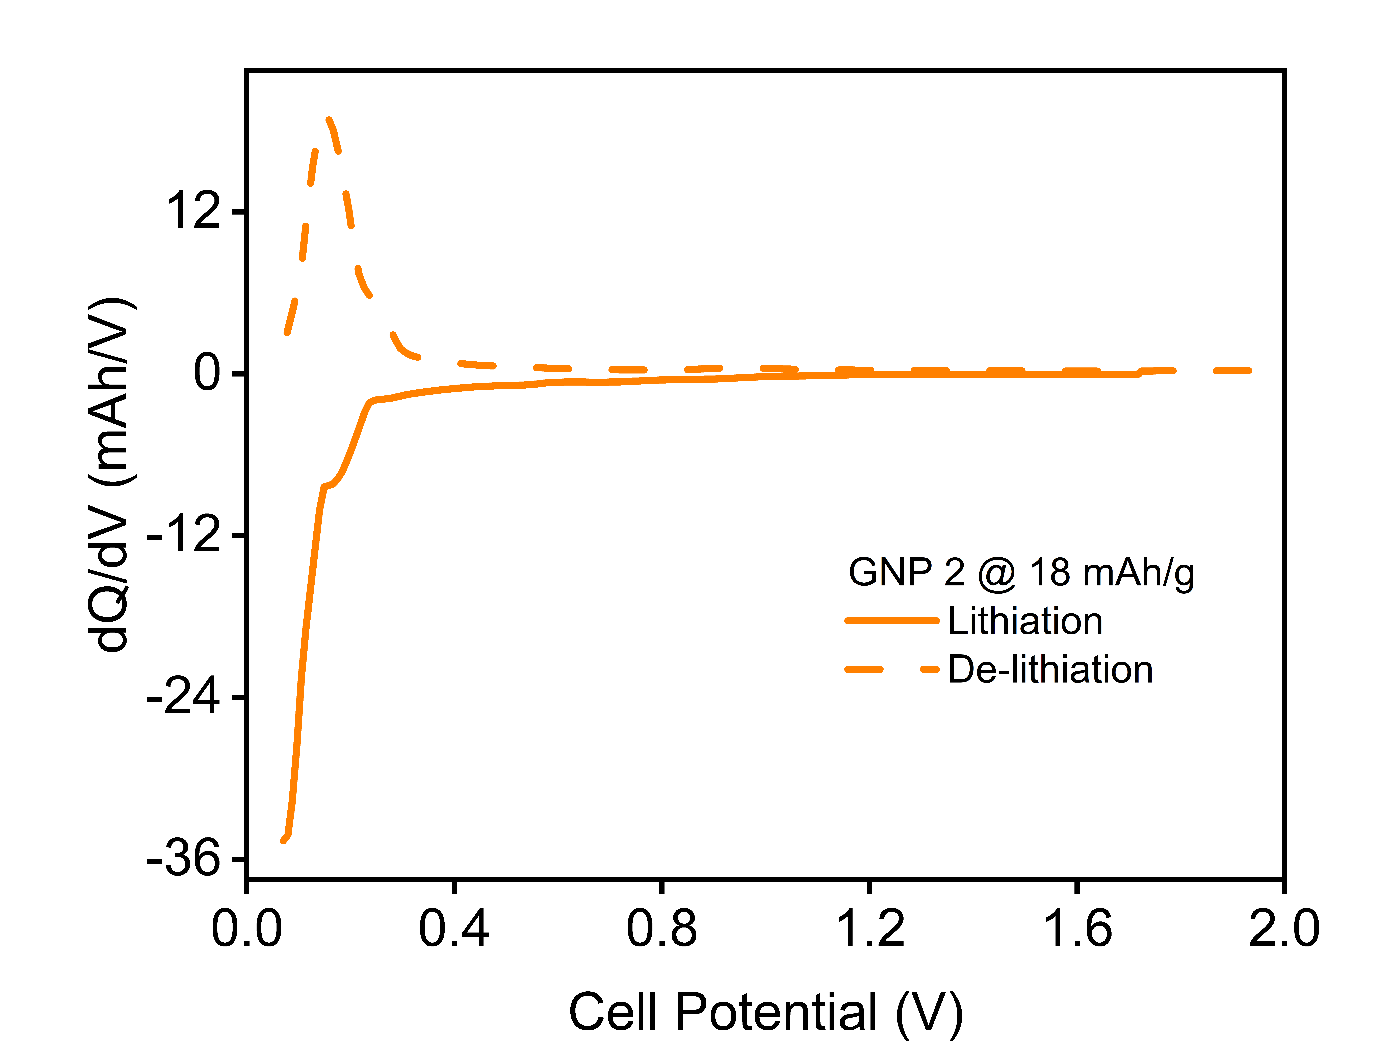
**
